# Supplementary figures and images for: One-step synthesis and characterization of hydrophilic polymer microspheresimmobilized with polyphenylsulfone ultrafiltration membranes for protein rejection application
Source: Research Square preprint supplement (doi:10.21203/rs.3.rs-1331802/v1), 2022-03-07

**Graphical abstract**

**
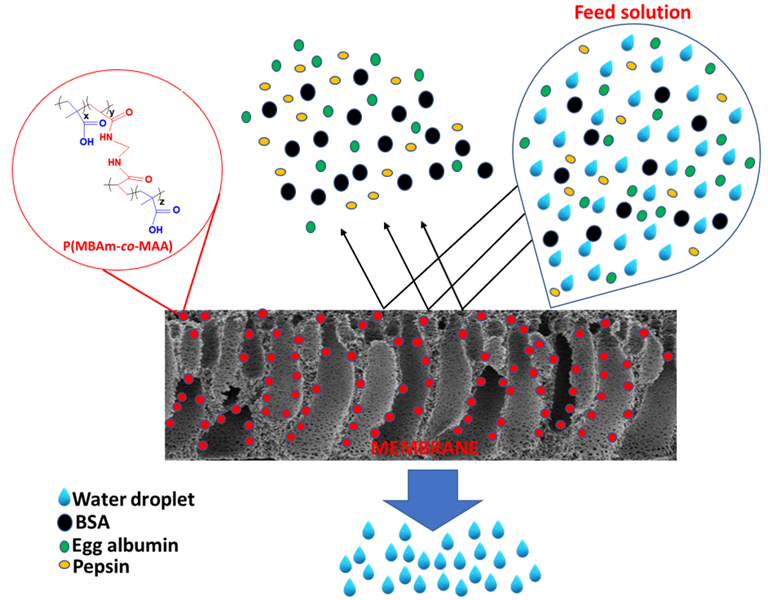
**

Supplement: Supplementary file 1 [file 92eed25dc0fe202e018e2f99.docx]
